# Supplementary material for: IL-33 contributes to sepsis-induced long-term immunosuppression by expanding the regulatory T cell population
Source: PubMed Central journal article supplement (PMC5382289; doi:10.1038/ncomms14919), 2017-04-04
Supplement: ncomms14919-s1.pdf [file ncomms14919-s1.pdf]

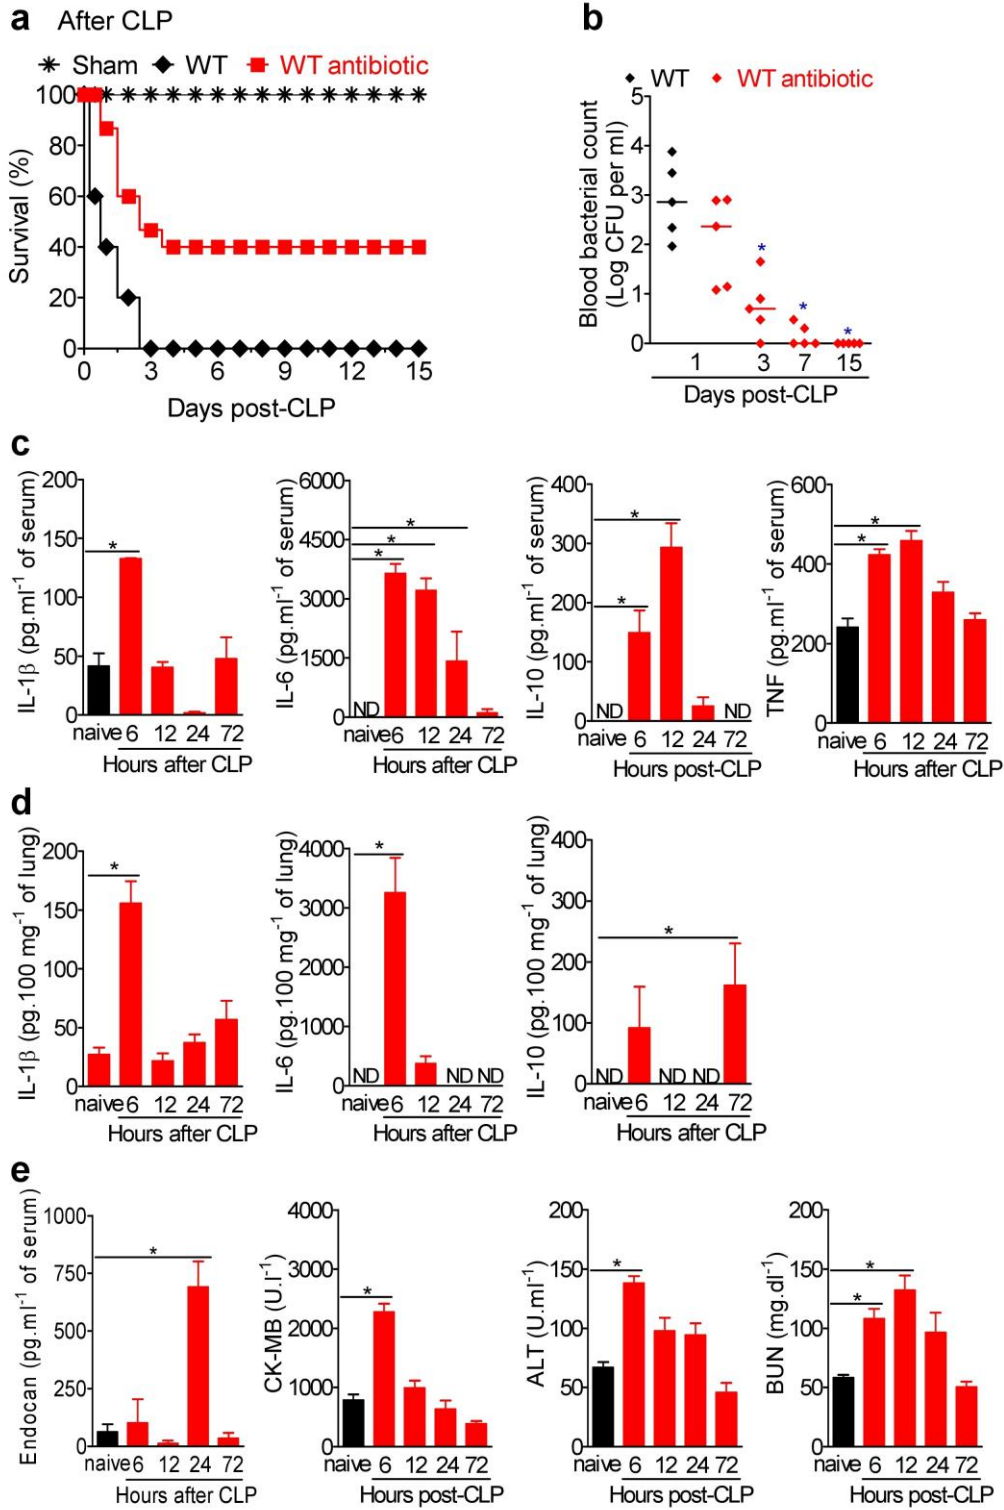

**Supplementary Figure 1. Antibiotic partially rescues mice from sepsis. (a-b)** BALB/c mice under CLP were treated with antibiotic or PBS. **(a)** Survival curves. WT Sham (n=5), WT CLP or WT CLP antibiotic (n=20). **(b)** Bacterial load in the blood after CLP. **(c-d)** Serum and lungs of C57BL/6J mice under CLP were collected at the indicated times points. IL-1 $\beta$ , IL-6 and IL-10 concentrations in serum **(c)** and lung tissue **(d)** were determined by ELISA.**(e)** Serum endocan concentration was determined by ELISA and the levels of creatine kinase-MB (CK-MB), alanine aminotransferase (ALT) and blood urea nitrogen (BUN) were determined by colorimetric assays. ND, not detected. \*p < 0.05 compare with naïve control or day 0 **(b)** (Mantel-Cox log-rank test in **a**, Mann-Whitney U test in **b** and one-way ANOVA result with Dunnett posthoc tests in **c-e**). Data are representative of three **(a-b)** or two **(a, b, g)** (mean  $\pm$  s.e.m. in **c-e** and median in **b**).

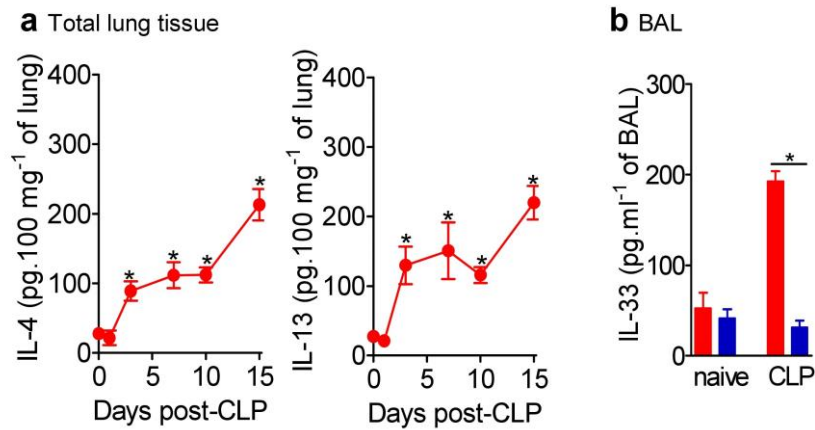

**Supplementary Figure 2. Kinetics of type-2 cytokines production during CLP.** Lungs and bronchial lavage (BAL) fluids of mice under CLP and treated with antibiotic were collected at the indicated times points. **(a)** IL-4 and IL-13 concentrations in the lung tissues of C57BL/6J were determined by ELISA. **(b)** IL-33 concentrations in the BAL of BALB/c and *Il1rl1*<sup>-/-</sup> at day 15 after CLP were determined by ELISA. \* $p < 0.05$  and \*\* $p < 0.01$ , comparing groups as indicated or with day 0 (one-way ANOVA result with Dunnett posthoc tests in **a** and two-tailed unpaired Student's *t*-test in **b**). Data are mean  $\pm$  sem of 3-10 mice/group.

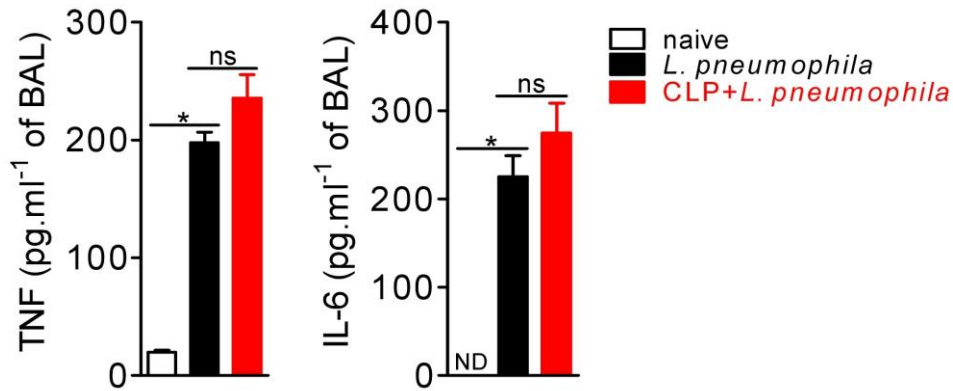

**Supplementary Figure 3. Proinflammatory cytokines production during secondary infection in sepsis-surviving mice.** C57BL/6J mice were subjected to CLP and challenged i.n. 15 days later with *L. pneumophila*. TNF and IL-6 concentrations in the BAL were determined by ELISA 12 h after challenge. ND, not detected. \* $p < 0.05$  (two-tailed unpaired Student's *t*-test), ns, not significant. Data are mean  $\pm$  sem of 3-5 mice/group.

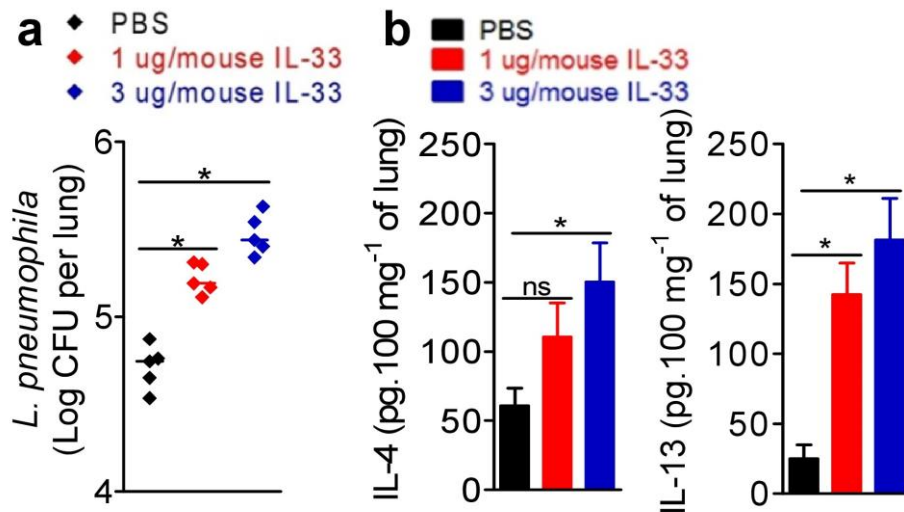

**Supplementary Figure 4. Repeated administration of IL-33 impaired bacterial clearance and increased type-2 cytokines production.** BALB/c mice were inoculated i.n. with 1 or 3  $\mu$ g of IL-33 or PBS for 4 consecutive days and challenged i.n. 2 days later with *L. pneumophila*. **(a)** Bacterial load in the lung tissue 48 h after challenge ( $n = 5$  mice per group). **(b)** IL-4 and IL-13 concentrations in the lung tissue 48 h after challenge ( $n = 5$  mice per group). \* $p < 0.05$  (Mann-Whitney U test in **a** and two-tailed unpaired Student's *t*-test in **b**), ns, not significant. Data are median (**a**) and mean  $\pm$  sem (**b**) of 5 mice/group.

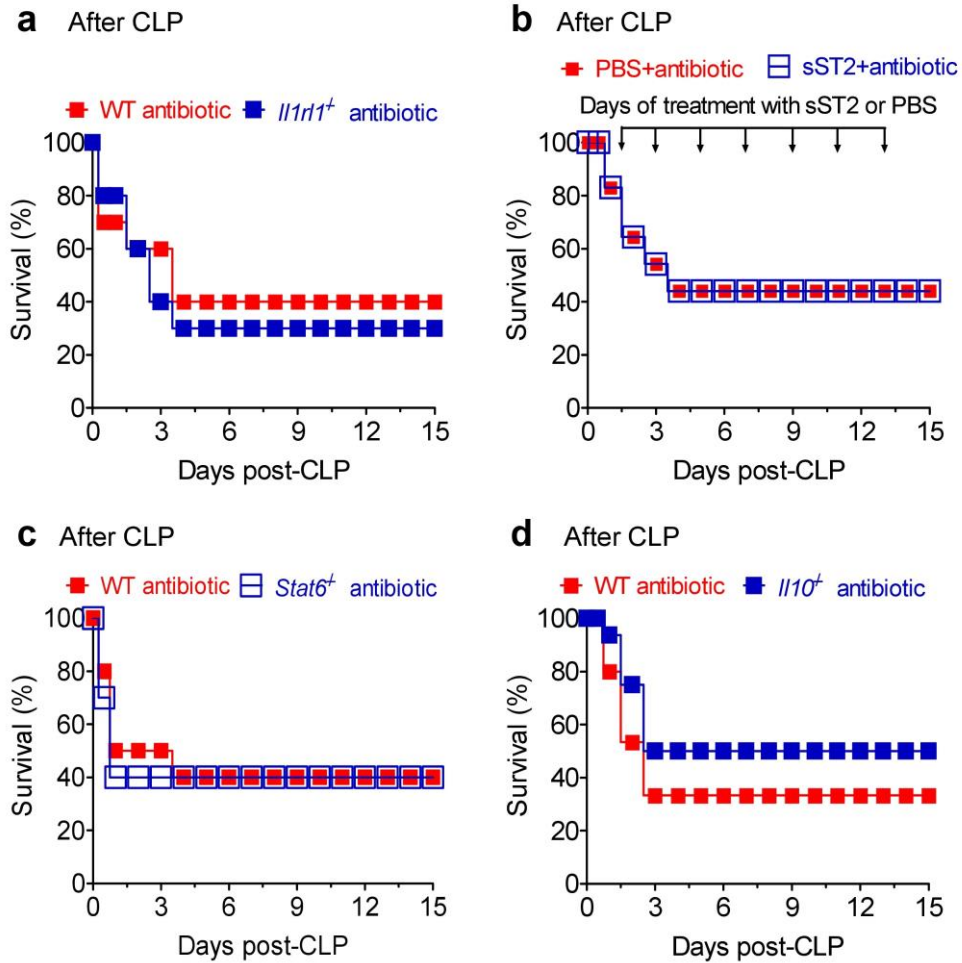

**Supplementary Figure 5. WT, *Il1r1*<sup>-/-</sup>, *Stat6*<sup>-/-</sup> and *Il10*<sup>-/-</sup> mice show similar survival curves following CLP and antibiotic treatment.** Survival curves after CLP of (a) BALB/c and *Il1r1*<sup>-/-</sup> mice ( $n = 40$  for WT group and  $n = 45$  mice for *Il1r1*<sup>-/-</sup> CLP group), (b) BALB/c mice treated with sST2 or PBS ( $n = 15$  mice per group), (c) BALB/c and *Stat6*<sup>-/-</sup> mice ( $n = 40$  for WT group and  $n = 42$  mice for *Stat6*<sup>-/-</sup> CLP group), and (d) C57BL/6J and *Il10*<sup>-/-</sup> mice ( $n = 40$  for WT group and  $n = 36$  mice for *Il10*<sup>-/-</sup> CLP group). Data are percentage of survival from 1 experiment (b) or pooled from three (d), five (c) or six (a) experiments.

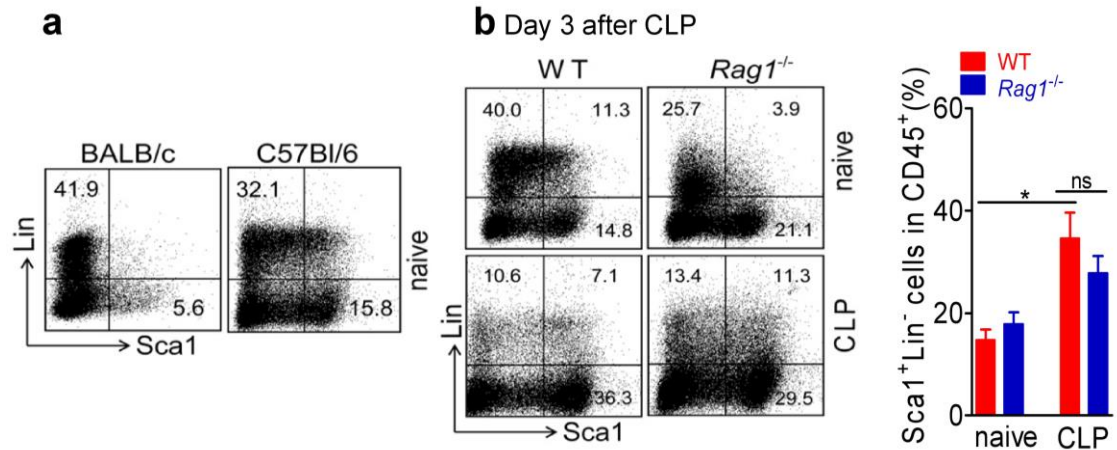

**Supplementary Figure 6. Induction of ILC2 in *Rag1*<sup>-/-</sup> sepsis-surviving mice.** Lungs of C57BL/6J and *Rag1*<sup>-/-</sup> mice under CLP and antibiotic treatment were collected on day 3 after CLP. **(a)** Representative FACS plots of ILC2<sup>+</sup> cells (Sca1<sup>+</sup> in Lin<sup>-</sup>CD45<sup>+</sup> cells) from BALB/c and C57BL/6J mice was determined by FACS ( $n \geq 3$  mice per group). Representative FACS plots from one experiment. **(b)** Representative FACS plots and frequency of ILC2<sup>+</sup> cells (Sca1<sup>+</sup> in Lin<sup>-</sup>CD45<sup>+</sup> cells) from C57BL/6J and *Rag1*<sup>-/-</sup> mice was determined by FACS ( $n \geq 3$  mice per group). \* $p < 0.05$  (two-tailed unpaired Student's *t*-test in **b**), ns, not significant. Data are mean  $\pm$  sem of 3-5 mice/group.

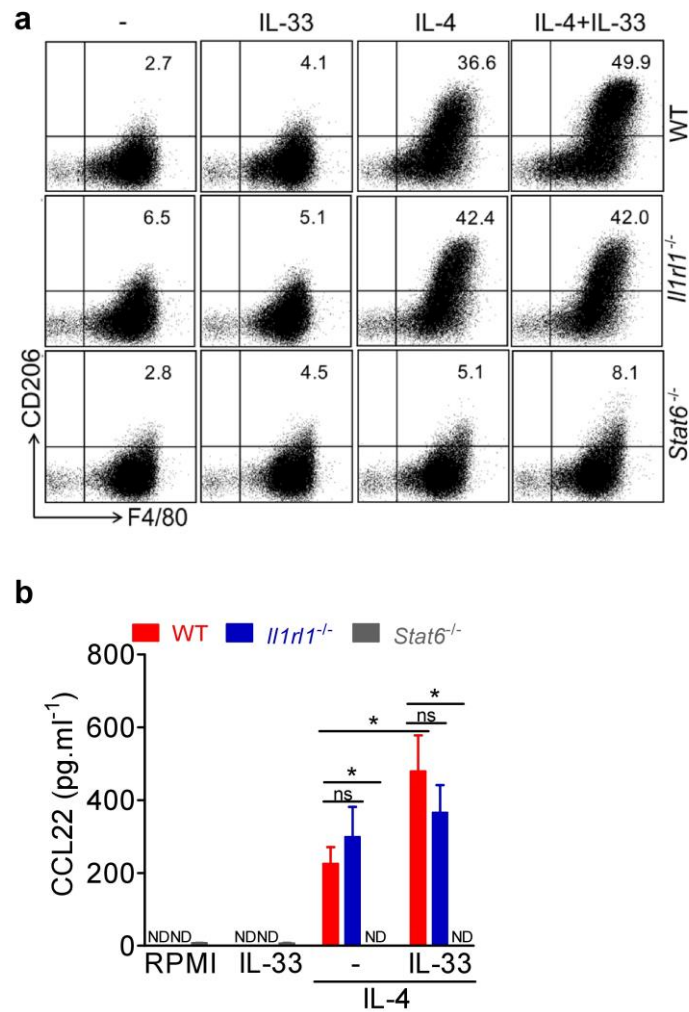

**Supplementary Figure 7. M2 polarization with IL-4 ± IL-33 was abolished in *Stat6*<sup>-/-</sup> BMDM *in vitro*.** BMDM from BALB/c, BALB/c *Stat6*<sup>-/-</sup> or BALB/c *Il1r1*<sup>-/-</sup> mice were cultured for 2 days in the presence of IL-4 and/or IL-33, or medium alone. **(a)** Percentage of F4/80<sup>+</sup>CD206<sup>+</sup> cells was analysed by FACS (each cell type was pooled from 2 mice and from 2 well per group). **(b)** Concentrations of CCL22 in the 2 days culture supernatants determined by ELISA (each cell type was pooled from 2 mice and 3-5 well per group). ND, not detected. \**p* < 0.05 (two-tailed unpaired Student's *t*-test in **b**), ns, not significant.



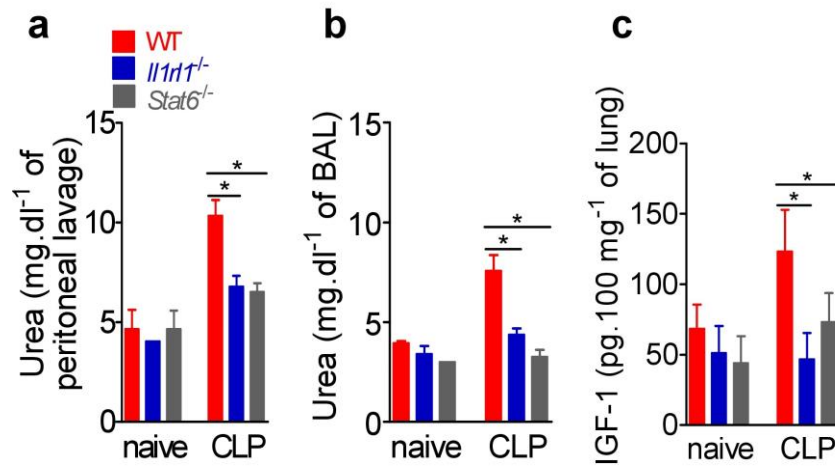

**Supplementary Figure 8. Production of urea, IGF-1 and TGF- $\beta$  of macrophages from sepsis-surviving mice.** Peritoneal lavage fluid and lungs from BALB/c, *Il1r1*<sup>-/-</sup> and *Stat6*<sup>-/-</sup> mice under CLP and antibiotic treatment were collected on day 15 after CLP. **(a-b)** Urea concentrations in the peritoneal lavage **(a)** and BAL **(b)** were determined by colorimetric assays. **(c)** IGF-1 concentrations in the lung tissue were determined by ELISA. \* $p < 0.05$  and \*\* $p < 0.01$  (two-tailed unpaired Student's *t*-test). Data are representative of two independent experiments (mean  $\pm$  sem of 3–8 mice/group).

### a Transfer of M2

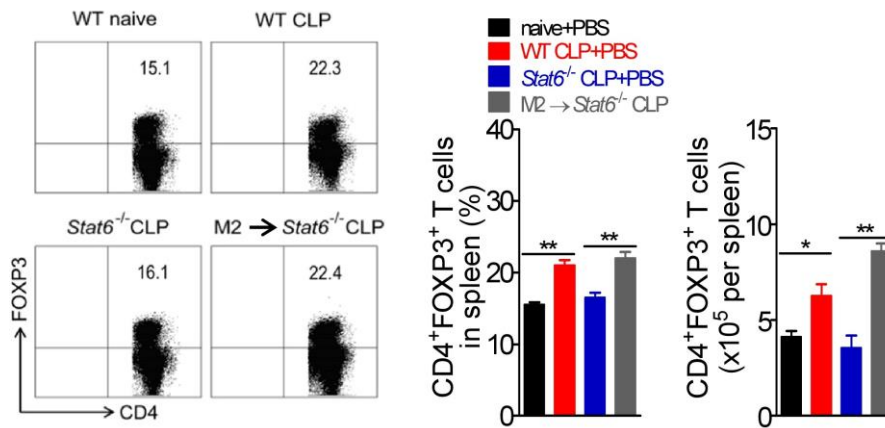

### b Transfer of M2

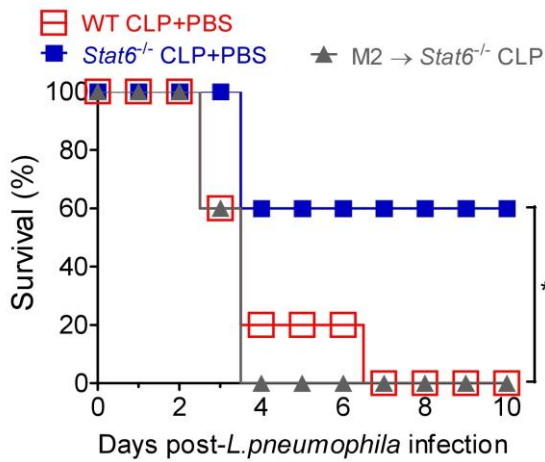

**Supplementary Figure 9. M2 macrophage induces expansion of Treg cell population in sepsis-surviving mice.** PBS or M2 macrophages were adoptively transferred ( $4 \times 10^6$  cells, i.v., on day 3 after CLP) into BALB/c or Stat6<sup>-/-</sup> sepsis-surviving mice. The surviving mice were either sacrificed or challenged with *L. pneumophila* on day 15 after CLP. (a) Representative FACS plots, frequency and number of Foxp3<sup>+</sup> CD4<sup>+</sup> T cells ( $n = 3$  mice per group). (b) Survival curves of mice after *L. pneumophila* challenge ( $n = 10$  mice per group). \* $p < 0.05$  and \*\* $p < 0.01$  (two-tailed unpaired Student's *t* test in a, Mantel-Cox log-rank test in b). Data are representative of two (a) independent experiments or are pooled of two (b) experiments (mean  $\pm$  s.e.m. in a).

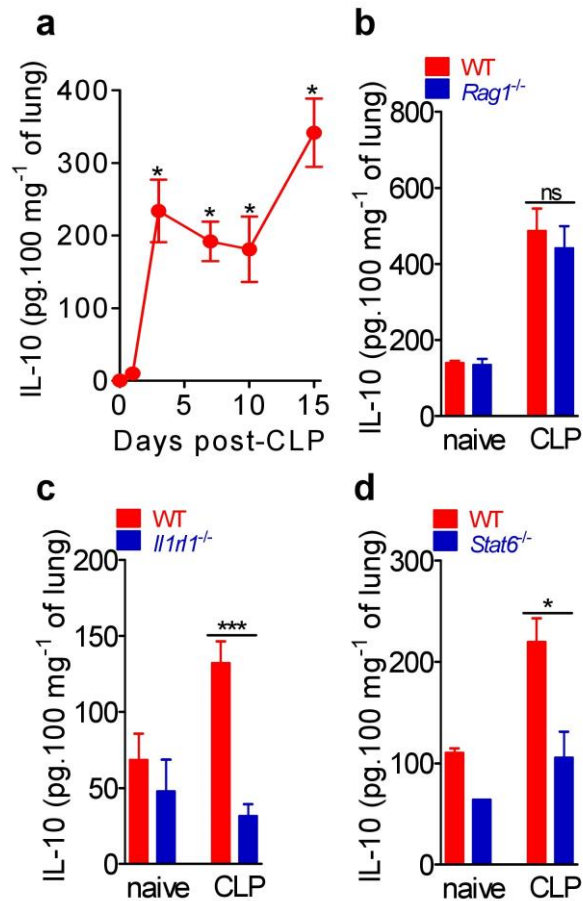

**Supplementary Figure 10. IL-10 production in the lungs of sepsis-surviving mice.** (a) Lung tissues from C57BL/6J mice under CLP and antibiotic treatment were collected at the indicated times points and IL-10 concentrations determined by ELISA. (b-d) Lung tissues of C57BL/6J, *Rag1*<sup>-/-</sup> (b), BALB/c, *Il1rl1*<sup>-/-</sup> and *Stat6*<sup>-/-</sup> (c-d) mice under CLP and antibiotic treatment were collected on day 15 after CLP and IL-10 concentrations determined by ELISA. \*p < 0.05, \*\*\*p < 0.001 comparing groups as indicated or day 0 (a) (one-way ANOVA result with Dunnett posthoc tests in a and two-tailed unpaired Student's *t*-test in b-d). Data are representative of two independent experiments (mean ± sem of 3–10 mice/group).

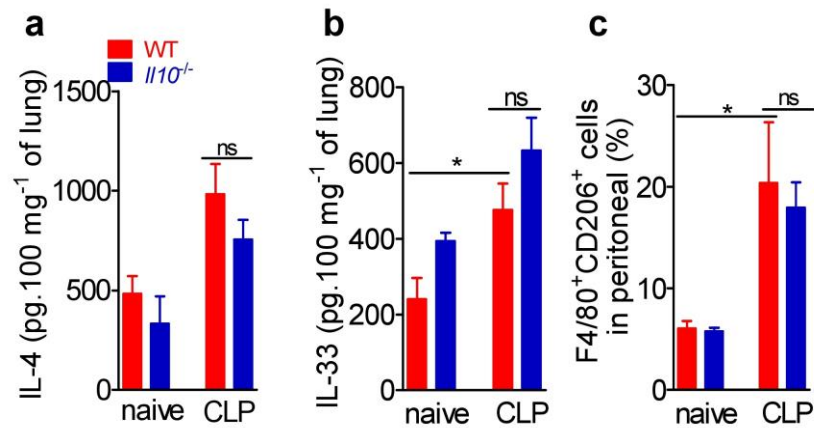

**Supplementary Figure 11. C57BL/6J and *Il10*<sup>-/-</sup> mice produced similar levels of type-2 cytokines and frequency of M2 macrophages during sepsis.** Lungs and peritoneal lavage fluids from C57BL/6J and *Il10*<sup>-/-</sup> mice under CLP and antibiotic treatment were collected on day 15 after CLP. IL-4 (a) and IL-33 (b) concentrations in the lung tissue were determined by ELISA. (c) Frequency of peritoneal F4/80<sup>+</sup>CD206<sup>+</sup> macrophages was determined by FACS. \*p < 0.05 (two-tailed unpaired Student's *t*-test), ns, not significant. Data are representative of two independent experiments (mean ± sem of 3–12 mice/group).

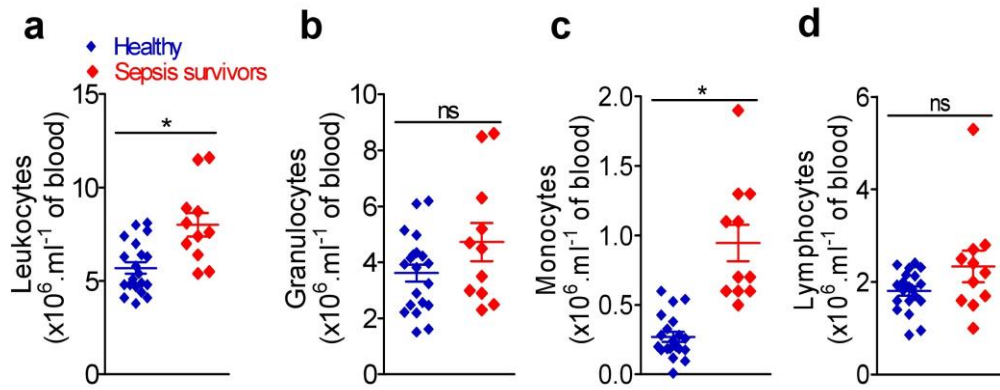

**Supplementary Figure 12. Differential cell counts of the peripheral blood of septic patients.** Peripheral blood from sepsis-surviving patients ( $n=11$ ) and healthy controls ( $n = 14$ ) was examined for (a) leukocytes, (b) granulocytes, (c) monocytes and (d) lymphocytes. Data are mean  $\pm$  s.e.m. \* $p < 0.05$  (two-tailed unpaired Student's  $t$ -test), ns, not significant.

**a** ARG1

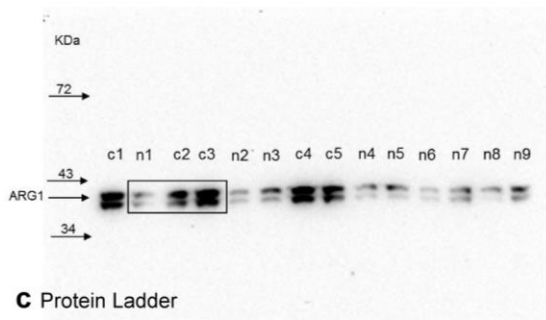

**b** GAPDH

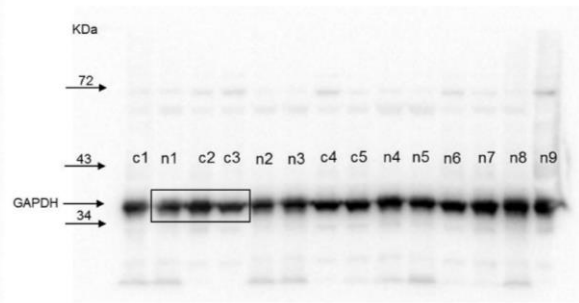

**c** Protein Ladder

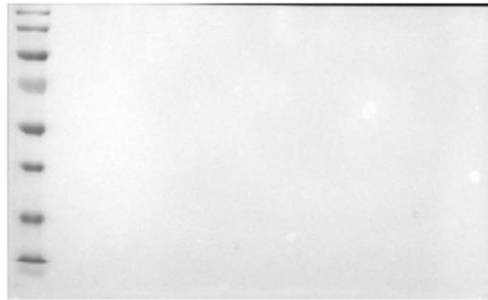

**Supplementary Figure 13. Full scan of the original uncropped western blot.** Original Western blots used in Fig. 4e. **(a)** Western blot for Arg1. **(b)** Western blot for GAPDH. **(c)** Protein Ladder. n, naïve mice (n=9 mice). c, CLP mice (n=5 mice).

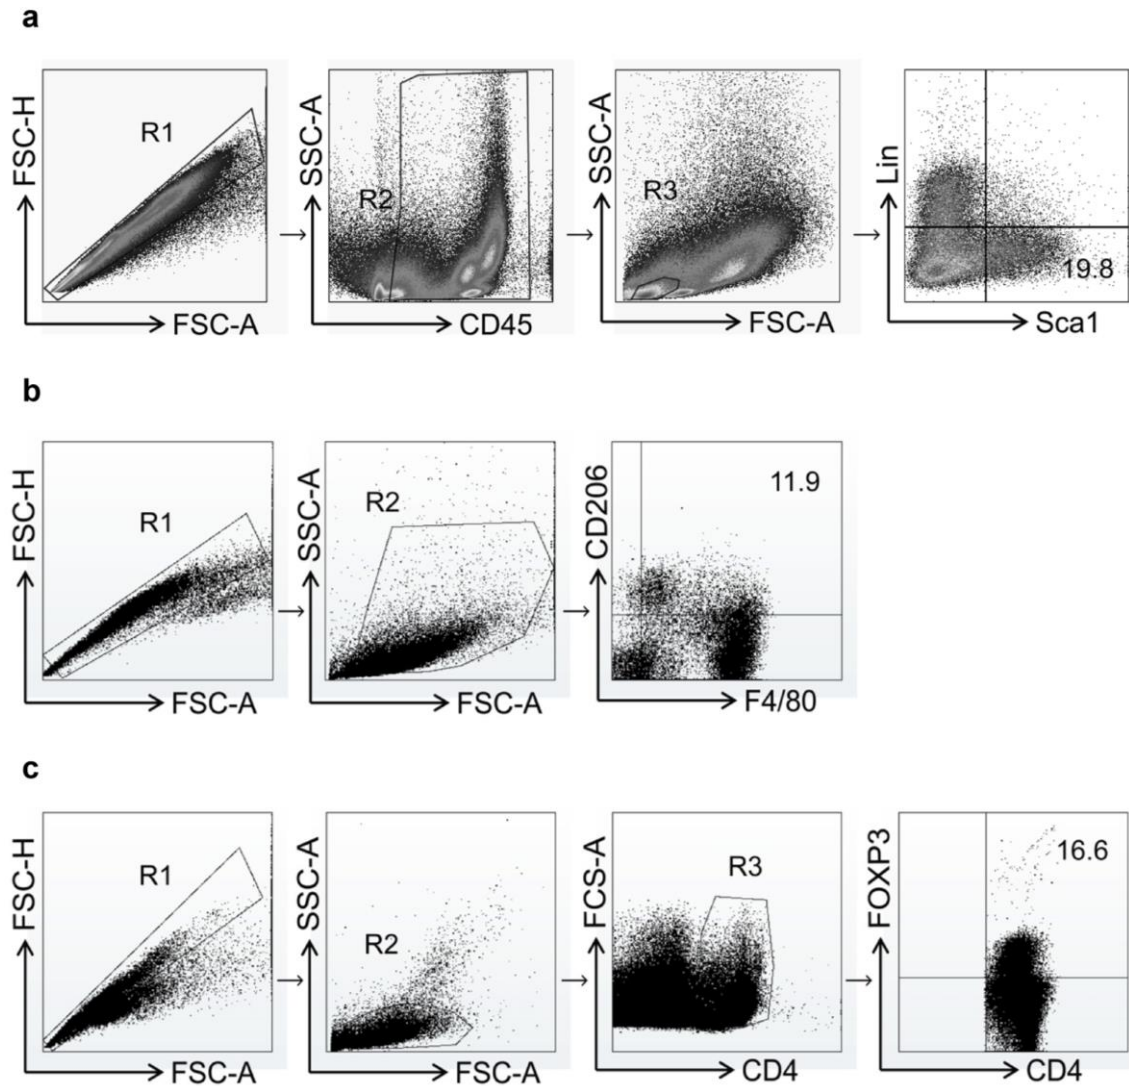

**Supplementary Figure 14. Representative gating strategies used for flow cytometry analysis.** Doublets were excluded by FSC-H and FSC-A gating for all flow cytometry analysis. **(a)** Proportion of ILC2 cells stained for ST2<sup>+</sup>Lin<sup>-</sup> (CD3<sup>-</sup>CD11c<sup>-</sup>CD19<sup>-</sup>F4/80<sup>-</sup>) among CD45<sup>+</sup> cells in single cell suspensions of lung cells. **(b)** Proportion of M2 macrophages stained for CD206<sup>+</sup> and F4/80<sup>+</sup> in peritoneal cells. **(c)** Proportion of Treg cells stained for FOXP3<sup>+</sup> among CD4<sup>+</sup> cells in spleen cells.

## Supplementary Table 1

### Demographic and clinical characteristics of septic patients

| Patients                | n=11                |
|-------------------------|---------------------|
| Age (years) - mean (SD) | 60.2 ( $\pm$ 12.83) |
| Female/Male             | 4/7                 |
| APACHE II - mean (SD)   | 17.72 ( $\pm$ 9.73) |
| SOFA - mean (SD)        | 9.81 ( $\pm$ 4.87)  |
| SAP3 - mean (SD)        | 45.7 ( $\pm$ 23.98) |

SD: standard deviation, APACHE II: Acute Physiology and Chronic Health Evaluation II, SOFA: Sepsis-related Organ Failure Assessment, SAP3: Simplified Acute Physiology score 3.



## Supplementary Table 2

### Clinical characteristics of septic patients

| Patients | Site of Infection | Time after sepsis (months) | Severity of sepsis | Microorganisms isolated            |
|----------|-------------------|----------------------------|--------------------|------------------------------------|
| 1        | Respiratory       | 5                          | Septic Shock       | <i>Staphylococcus haemolyticus</i> |
| 2        | Respiratory       | 7                          | Severe Sepsis      | <i>Enterococcus faecium</i>        |
| 3        | Respiratory       | 7                          | Severe Sepsis      | <i>Escherichia coli</i>            |
| 4        | Respiratory       | 10                         | Septic Shock       | <i>Streptococcus pneumoniae</i>    |
| 5        | Respiratory       | 9                          | Severe Sepsis      | Negative                           |
| 6        | Respiratory       | 7                          | Septic Shock       | Negative                           |
| 7        | Respiratory       | 6                          | Severe Sepsis      | Negative                           |
| 8        | Respiratory       | 5                          | Septic Shock       | <i>Staphylococcus haemolyticus</i> |
| 9        | Skin              | 5                          | Septic Shock       | Negative                           |
| 10       | Urinary           | 9                          | Severe Sepsis      | <i>Staphylococcus aureus</i>       |
| 11       | Respiratory       | 7                          | Severe Sepsis      | Negative                           |
